# Supplementary material for: Sexual violence and rapes’ increment during the COVID-19 pandemic in Bangladesh
Source: PubMed Central journal article supplement — eClinicalMedicine. 2021 Apr 6;34:100817. doi: 10.1016/j.eclinm.2021.100817 (PMC8056419; doi:10.1016/j.eclinm.2021.100817), 2021-04-06
Supplement: mmc1.pdf [file mmc1.pdf]

## করোনা মহামারিতে বাংলাদেশে যৌন সহিংসতা এবং ধর্ষণ বৃদ্ধি

মৌখিক যৌন হয়রানি থেকে শুরু করে জোরপূর্বক যৌনসংগম যৌন নিপীড়ন কার্যকলাপ এর মধ্যে অন্তর্ভুক্ত। বিশ্ব স্বাস্থ্য সংস্থার মতে, যেকোনো যৌন কার্যকলাপ, যৌন কার্যকলাপ করার প্রচেষ্টা, অযাচিত যৌন মন্তব্য অথবা অযাচিত ঘনিষ্ঠ হওয়ার চেষ্টা, অপহরণ করার চেষ্টা বা জোরপূর্বক কোনো ব্যক্তিকে যৌনতার দিকে পরিচালিত করা, ভুক্তভোগীর সাথে সম্পর্কিত ব্যক্তি ছাড়াও যে কারো দ্বারা, যে কোনো পরিস্থিতিতে ঘটতে পারে যা শুধু বাড়ি ও কর্মক্ষেত্রের মধ্যেই সীমাবদ্ধ নয়। বিশ্ব স্বাস্থ্য সংস্থার অনুমিত তথ্য অনুসারে, প্রায় ৩৫% নারী তাদের জীবনে তাদের ঘনিষ্ঠ সঙ্গী বা অন্যকারো দ্বারা যৌন ও শারীরিক ভাবে লাঞ্চিত হয়েছেন। বাংলাদেশে যৌন নিপীড়ন সংক্রান্ত নির্দিষ্ট পরিসংখ্যান সীমিত, তবে দেখা গেছে বাংলাদেশের প্রায় ৬০% পুরুষ তার স্ত্রী বা অন্তরঙ্গ সঙ্গীর সাথে সহিংস আচরণ করে। তাছাড়া, নারীর প্রতি সহিংস আচরণের ক্ষেত্রে বিশ্বে ইথিওপীয়ার পরই বাংলাদেশের অবস্থান (৫৮.৬% বনাম ৪৯.৭%)। জাতিসংঘ জনসংখ্যা তহবিলের মতে, শুধু বাংলাদেশেই নয়, পুরো বিশ্বব্যাপী করোনা মহামারির সময়ে পারিবারিক সহিংসতা এবং যৌন নির্যাতনের পরিমাণ বৃদ্ধি পেয়েছে। যার মধ্যে ধর্ষণ একটি মারাত্মক যৌন সহিংসতা যা নারীর জীবনযাত্রার ওপর বড় ধরনের প্রভাব ফেলে; যেমন- প্রজনন স্বাস্থ্যে (অনিরাপদ গর্ভপাত, যৌন অক্ষমতা), মানসিক স্বাস্থ্যে (হাতাশা, উদ্বেগ, আত্মহত্যা) এবং আচরণগত স্বাস্থ্যে (অনিরাপদ যৌন মিলন, একাধিক সঙ্গী)।

বাংলাদেশি মানবাধিকার সংস্থা 'অধিকার'-র তথ্যের ভিত্তিতে, ২০০১ থেকে ২০১৯ সালের মধ্যে কমপক্ষে ১৪,৭১৮ জন (যার মধ্যে, ৬,৯০০ জন নারী এবং ৭,৮১৮ জন শিশু) ধর্ষণের শিকার হন যার মধ্যে গণধর্ষণের ঘটনা ঘটেছে ২,৮২৩ টি। ২০০১ থেকে ২০১৯ সালের মধ্যে ২০০২-২০০৩ -তে সবচেয়ে বেশি ধর্ষণের ঘটনা পাওয়া গেছে (যথাক্রমে ১,৩৫০টি ও ১,৩৩৬টি); যদিও ২০০৮ সালের দিকে এই সংখ্যাটি ধীরেধীরে কমতে শুরু করে। কিন্তু, এই নিপীড়নের হার ২০১৯ সালে বৃদ্ধি পেয়েছে, যেখানে ১,০৮০টি ধর্ষণের ঘটনার খবর পাওয়া যায়, যদিও ২০১৮ সালে ধর্ষণের ৬৩৫ টি ঘটনা ঘটে। তাছাড়াও ২০২০ সালের প্রথম চারমাসে দেশে দৈনিক গড়ে ১৩টি ধর্ষণের ঘটনার খবর পাওয়া যায় এবং এরপরে ধর্ষণসহ যৌন নিপীড়নের তীব্রতা বৃদ্ধি লক্ষ্য করা গেছে। তারই পরিপ্রেক্ষিতে, ২০২০ সাল শেষে মোট ১,৬২৭টি ধর্ষণ এবং ৩১৭টি গণধর্ষণের ঘটনা নথিভুক্ত করা হয়েছে, যেখানে ২০১৯ সালে যথাক্রমে ১,০৮০টি ধর্ষণ ও ২৯৪টি গণধর্ষণের ঘটনা পাওয়া যায়।

আরো উদ্বেগের বিষয় হলো, মহামারীর মধ্যে বাংলাদেশে ধর্ষণ ব্যাপক হারে বৃদ্ধি পেয়েছে। বাংলাদেশের ৫৩ জেলায় ৩৮,১২৫ জনের ওপর 'মানুষের জন্য ফাউন্ডেশন' কর্তৃক পরিচালিত একটি টেলিফোন জরিপের তথ্যানুসারে, ২০২০ সালের জুন মাসে কমপক্ষে ৪,৬২২ জন মানসিক নির্যাতন, ১,৮৩৯ জন শারীরিক নির্যাতন ও ২০৩ জন যৌন নিপীড়নের শিকার হয়েছেন, যা পূর্ববর্তী বছরের তুলনায় অনেক বেশি। এছাড়াও সবচেয়ে বড় উদ্বেগের বিষয়গুলোর মধ্যে একটি হলো যে, কেবল ভুক্তভোগীদের মধ্যে ৩% সহিংসতার বিরুদ্ধে ন্যায়বিচার চায়, যার মধ্যে ২% স্থানীয় নেতাকর্মী বা গ্রাম্য সালিশের মাধ্যমে এবং ১% আইনপ্রয়োগকারী কর্তৃপক্ষের মাধ্যমে। কিন্তু এই পরিসংখ্যানটা মহামারীর পূর্বের এবং সম্প্রতি সাহায্য চাওয়ার হার আরও হ্রাস পেয়েছে। বাংলাদেশে যৌন নিপীড়নের শিকারদের পক্ষে ন্যায়বিচার ও সমর্থন অপরিচালিত হওয়ার কারণে সম্প্রতি দেশব্যাপী ব্যাপক আন্দোলন হলেও পরিস্থিতির কোন আশানুরূপ পরিবর্তন ঘটেনি।

২০২০ সালের জানুয়ারি থেকে অক্টোবর মাসের মধ্যে বাংলাদেশের জাতীয় পত্রিকাগুলোয় ১,০৯৩টি ধর্ষণের ঘটনার প্রতিবেদন করা হয়েছে। গণমাধ্যমের এই প্রতিবেদনগুলো আইসবার্গ এর চূড়ার মত; যদিও কিছু ঘটনার অতিরঞ্জিত উপস্থাপন করা হয়েছে, যেখানে দেশে ২৮টি মৃত্যুর ঘটনা ঘটেছে। তা সত্ত্বেও এগুলো মহামারিতে বাংলাদেশে সংঘটিত ধর্ষণের সহিংসতার তীব্রতা উপলব্ধিতে সহায়ক। এই ঘটনাগুলোর প্রেক্ষিতে এবং আন্দোলনের ফলে বাংলাদেশ সরকার ২০২০ সালের অক্টোবর মাসে একটি

বিল পাশ করে, যেখানে কেউ ধর্ষণের ঘটনায় দোষী প্রমাণিত হলে তাকে যাবজ্জীবন কারাদণ্ড অথবা মৃত্যুদণ্ডে দণ্ডিত করা হবে। কিন্তু ঠিক তার পরেই, অর্থাৎ ২০২০ এর শেষ দুই মাসে ধর্ষণ ক্রমাগত বৃদ্ধি পেয়েছে, যেখানে ৫৩৪টি ঘটনা রিপোর্ট করা হয়েছে। স্পষ্টত, ধর্ষণের জন্য বর্ধিত দণ্ডবিধি এই সহিংসতার বন্ধের পরিবর্তন তৈরি করার জন্য পর্যাপ্ত নয়, যতক্ষণ না তা সমাজে প্রয়োগ করা হবে। সুতরাং, সরকারের পক্ষ থেকে যৌন নিপীড়ন বা সহিংসতার বিরুদ্ধে উদ্যোগ, যেমন যৌন সহিংসতা প্রতিরোধ কর্মসূচি এবং ভুক্তভোগীদের সহযোগিতা করার কর্মসূচির বিকাশ ঘটানো জরুরি।

এরই পরিপ্রেক্ষিতে, সরকারের কার্যকলাপ এর সাথে মানবাধিকার সংস্থার অংশগ্রহন সহযোগিতাপূর্ণ হতে পারে। এই কার্যক্রমগুলো যৌন নিপীড়ন বিষয়ে সচেতনতা এবং ভুক্তভোগী কিভাবে সাহায্য ও ন্যায়বিচার পেতে পারে, সেদিকে দিকনির্দেশনা দেওয়ার প্রতি নজর দিতে হবে। তাছাড়া, একটি সক্রিয় হটলাইন সেবা বাস্তবায়ন ও জরুরি যার মাধ্যমে ভুক্তভোগীরা নিজেদের নাম-পরিচয় গোপন রেখে নিপীড়নের কথা গুলো অবাধে বলতে পারে। সমাজকর্মীরা ও গুরুত্বপূর্ণ ভূমিকা পালন করতে পারে যেমন- কোথায় এবং কিভাবে সাহায্য চাওয়া যায় এ ব্যাপারে প্রচারে ও প্রসারে উল্লেখযোগ্য অবদান এর মাধ্যমে। পাশাপাশি আইন প্রয়োগকারী সংস্থা গুলোর উচিত দোষীদের বিরুদ্ধে মামলা করার জন্য ভুক্তভোগীদের উৎসাহিত করা। তাছাড়া, সরকারের নারীদের প্রতি যৌন নিপীড়ন মোকাবেলায় সুষ্ঠু ও দ্রুত বিচার প্রক্রিয়া পরিচালনা করা অতীব জরুরি। পরিশেষে বলা যায়, কেবলমাত্র সার্বিক ব্যবস্থাপনায় পরিবর্তনের মাধ্যমেই আমরা নারীর প্রতি যৌন সহিংসতার বিরুদ্ধে কার্যকর ভূমিকা রাখতে সক্ষম হব।

কৃতজ্ঞতা স্বীকারঃ

লেখকগন 'চিন্তা রিসার্চ বাংলাদেশ' -কে ধন্যবাদ জ্ঞাপন করতে চান, যেটা পূর্বে 'আন্ডারগ্রাজুয়েট রিসার্চ অরগানাইজেশন' হিসেবে পরিচিত ছিল। এই প্রবন্ধটির বাংলা অনুবাদটি অনলাইন সংযুক্তিতে পাওয়া যাবে। আমরা 'মাহমুদুল হাসান' (গবেষণা সহকারী, চিন্তা গবেষণা বাংলাদেশ) -কে অনুবাদে সাহায্য করার জন্য ধন্যবাদ জানাই।
